# Supplementary material
Source: PubMed Central journal article supplement (PMC151468)
Supplement: plntcell_14_8_1833__1.pdf [file plntcell_14_8_1833__1.pdf]

**Supplemental Data.** Nucleotide sequence and deduced amino acid sequence of the *ABA2* gene. The predicted amino acid sequence was confirmed by comparison of the genomic and cDNA sequence of *ABA2*. The coding region of the *ABA2* gene is written in uppercase. The -492 to 459 nucleotide deletion found in the *aba2-14* allele is underlined. The 737 to 789 nucleotide deletion found in the *aba2-11* allele is indicated in bold. An in-frame TAA stop codon is found 18 nucleotides upstream from the ATG translation initiation codon. Nucleotide numbering begins at the ATG start codon.

```

-540 acaactttcactagagaaatcggaaaacataaattacatttgtgaaaattcgtagaaa -481
-480 cacatgtgcgaagatcaatcatgaccatgaatgaatgtaatcgaatctcacggaatgatt -421
-420 acagaaagtgaaccacaaataacccaacactatactgtaattctgtatcatggacggtt -361
-360 tgatacggtttggattttcggtttcgatttacgaatcataattgtatccttaattttctaat -301
-300 cgatcggtttggtttgggtgcaaattggatcggcttaacttaacgtctctaaaatccgca -241
-240 aaatgtgcttataagtcaaatccggttaagctctttttattgqqcttacaatttaagggccataa -181
-180 aaacccaatgacgaagcaggacttgcctttttgatagcccgtatagagaccgacaccaaata -121
-120 gccgagaaacaacgcaaactccgattgagaggtgtttgcatgattcctgagcttgcctgt -61
-60 gtcaatagtgagccactacatcgaaggaataagaaagaaagatctaagggagctaaagctatt -1
1 ATGTCAACGAACACTGAATCTTCTTCTTATTCTTCTTCTTCTTAGTCAAAGgtataaagctt 60
M S T N T E S S S Y S S L P S O R
61 tctccaactttttcctctgatccaactctttttgattgatcttcgtttactttacctttt 120
121 tttcttcttqggtcattctaaatactgaaattttqttctttgaggggtcaaattaacagt 180
181 tgataatcagaccatggagttttttcagtttcatgagtgctcttgcctcgcacgacag 240
241 atgtgagatctagtcattggttctggttgcatttattgatgtcaaatcttgaaatggttatg 300
301 atctctaggtttcagtcctctttgctttttattatgatcttcaaacatttggattagtttt 360
361 atcagttctgattcaataaactaagtatatacatattgqctttttggtttacaaatctctcaa 420
421 cttcagatttggttattttgtgtcccatttggattcatctttacctcctttgcacggttctgt 480
481 ttcaaaactggatttgtggctcctttcttttaccattgtagttttgtggccagatcttt 540
541 ttttttttattttgtggccagatcaatttatgaataaagttctttttttttctgtgtgca 600
601 ttttcttctactggcttaagtttgatgtaacatctcaaccttattattaggagactatg 660
661 gtgagattggttaataccaatttaacttgccttttaactctcttgtgttcttgatgtga 720
721 cagGCTTTTGGGTAAAGTGGCATTGATCACTGGAGGAGCCACAGGGATAGGTGAGAGCAT 780
L L G K V A L I T G G A T G I G E S I
781 TGTTTCGTCTGTTCCACAAGCACGGTGCCAAAGTCTGCATTGTTGATCTGCAAGATGATCT 840
V R L F H K H G A K V C I V D L Q D D L
841 CGGAGGTGAGGTGTGTAAGTCTGCTTCGTGGTGAGTCCAAGGAGACGGCTTTTTCAT 900
G G E V C K S L L R G E S K E T A F F I
901 CCATGGCGATGTTAGAGTGGAAGATGACATTGCAATGCGGTTGACTTTGCAGTCAAAAA 960
H G D V R V E D D I S N A V D F A V K N
961 TTTTGGGACGCTTGATATACTTATCAACAATGCAGGATTATGTGGAGCACCGTGCCCTGA 1020
F G T L D I L I N N A G L C G A P C P D
1021 TATTTCGTAATTATAGTTTGGAGTGAGTTCGAGATGACCTTTGATGTGAATGTGAAAGGAGC 1080
I R N Y S L S E F E M T F D V N V K G A
1081 TTTTCTAAGCATGAAACATGCAGCTCGTGTAAATGATACCGGAGAAGAAAGGGTCGATAGT 1140
F L S M K H A A R R V M I P E K K G S I V
1141 TTCCTTATGTAGTGTGGGAGGTGTTGTGGGAGGCGTTGGTCCACATTCTTATGTTGGTTC 1200
S L C S V G G V V G G V G P H S Y V G S
1201 CAAGCATGCTGTTCTAGGCTTGACTAGGAGTGTTCAGCGGAGCTTGGACAGCACGGGAT 1260
K H A V L G L T R S V A A E L G Q H G I
1261 ACGTGTGAAGTGTGTTTCGCCTTACGCGGTTGCAACTAAACTCGCTTTGGCTCATTGACC 1320
R V N C V S P Y A V A T K L A L A H L P
1321 GGAGGAAGAAAGAACGGAGGATGCATTTGTTGGTTTCAGGAATTTTGCTGCTGCAAACGC 1380
E E E R T E D A F V G F R N F A A A N A
1381 GAATCTAAAAGGGGTGGAAGTACGCGTTGATGATGTAGCGAACGCTGTTCTGTTTGGC 1440
N L K G V E L T V D D V A N A V L F L A
1441 TAGCGATGACTCGCGGTACATAAGCGGAGATAATTTGATGATTGATGGAGGATTCACTTG 1500
S D D S R Y I S G D N L M I D G G F T C
1501 CACTAACCCTCTTTAAAGTCTTACAGATGATgcattttgctaaagaatggtggttaagt 1560
T N H S F K V F R *
1561 tttattgtccgccaatttatcatgtctatcaaataatttaactgtggagcttattgtggt 1620
1621 tttattgttacttttagcattgtagaatggttgatgttaactacatttcttactggtgta 1680
1681 gacattgacaataatcagattctcataatgattaaaagattgagtagcaaaaatcat 1740
1741 aatgatgtattgatgtttcttgaattagagaggactacaactttgacgagaaattgtctg 1800
1801 attaacagtatctactagaatcccacatgccacttttgctgttcatcaagataattata 1860
1861 aaacaaaattccattaatctgattagaaactgcatacattttctatgattatataatcta 1920

```

1921 gaaagtcaaattcaaatgatgagaaagtataaagtttgataaaccaaataattgagtaa 1980  
1981 aactcaagttccttacctttaagggaacggaagaacaaaacgccaagtt 2031
